# Supplementary material
Source: PubMed Central journal article supplement (PMC9672178)
Supplement: 40200_2022_1010_MOESM1_ESM.pdf [file 40200_2022_1010_MOESM1_ESM.pdf]

**Elsayed Z. Soliman, MD, MSc, MS, FAHA, FACC**  
Professor and Director

15 Feb 2022

Mahbube Ebrahimpur, M.D.  
Section Editor  
Journal of Diabetes & Metabolic Disorders

Dear Dr., Ebrahimpur

Once again, thank you for the opportunity to revise and resubmit our manuscript entitled "*Association between Periodontitis and Diabetes Mellitus in the general population*".

In the revised version, we have added the references suggested by Reviewer #2. We hope this would be the last reversion of the manuscript we need to submit, and it meets your acceptance

We confirm that this manuscript still has not been previously published and is not currently under consideration by any other journal. Additionally, all the authors have approved the contents of this paper and have agreed to the *Journal's* submission policies.

Sincerely,

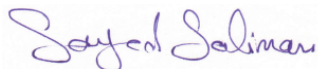

Elsayed Z. Soliman MD, MSc, MS, FAHA, FACC  
Director, Epidemiological Cardiology Research Center  
Professor, Internal Medicine- Cardiology  
Professor, Public Health Science- Epidemiology

*Wake Forest School of Medicine*
